# Supplementary material for: Kinome-Wide RNAi Screen Implicates at Least 5 Host Hepatocyte Kinases in Plasmodium Sporozoite Infection
Source: PubMed Central journal article supplement (PMC2574010; doi:10.1371/journal.ppat.1000201), 2008-11-07
Supplement: ppat.1000201.s002.pdf [file ppat.1000201.s002.pdf]

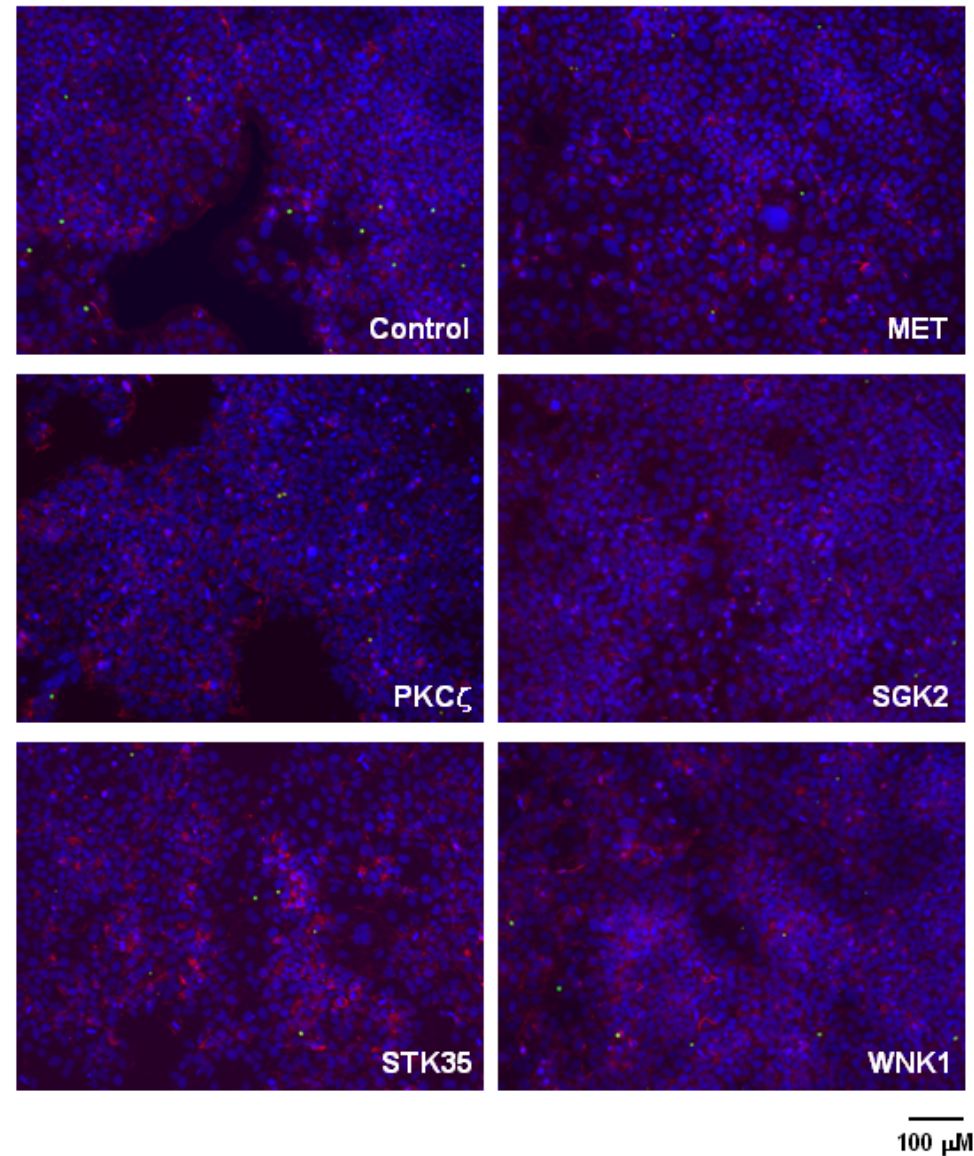

**Figure S1.** Infected cells following knock-down of hit genes identified in the RNAi screen. Representative pictures of cells transfected with siRNAs targeting MET, PRKWNK1, SGK2, STK35, PKC $\zeta$  and a Negative control siRNA, 24 hours after infection with *P. berghei* sporozoites. The pictures depict nuclei (in blue), actin (in red) and EEFs (in green) and show that cell confluency and morphology are not affected by gene knock-down whereas infection is decreased in all cases.
